# Supplementary material for: Report of Hermansky–Pudlak Syndrome in Two Families with Novel Variants in HPS3 and HPS4 Genes
Source: MDPI journal article supplement (doi:10.3390/genes14010145), 2023-01-05
Supplement: s1 [file s1]

# Supplementary Data

**Table S1:** All HPS with their classifications, respective phenotypes reported in literature and genes.  
+ reported in disorder, - Not present in disorder, n/r not reported/ not observed in literature

| S/N | Clinicals/<br>Phenotypes                                                     | HPS<br>1 | HPS<br>2 | HPS<br>3 | HPS<br>4 | HPS5  | HPS<br>6 | HPS7   | HPS8  | HPS9   | HPS<br>10 | HPS11  |
|-----|------------------------------------------------------------------------------|----------|----------|----------|----------|-------|----------|--------|-------|--------|-----------|--------|
| 1   | Ocular albinism                                                              | +        | +        | +        | +        | +     | +        | +      | +     | +      | +         | +      |
| 2   | Hypopigmentation of retina                                                   | +        | n/r      | +        | +        | n/r   | n/r      | n/r    | +     | +      | -         | +      |
| 3   | Hypopigmentation of fundus                                                   | +        | +        | n/r      | n/r      | n/r   | +        | n/r    | +     | +      | -         | n/r    |
| 4   | Reduced visual acuity                                                        | +        | +        | +        | +        | +     | +        | +      | +     | -      | -         | +      |
| 5   | Horizontal nystagmus                                                         | +        | +        | +        | +        | +     | +        | +      | +     | +      | +         | +      |
| 6   | Photophobia                                                                  | +        | +        | +        | +        | n/r   | +        | n/r    | n/r   | +      | -         | +      |
| 7   | Strabismus                                                                   | +        | +        | n/r      | n/r      | +     | +        | n/r    | n/r   | +      | -         | +      |
| 8   | Iris transillumination                                                       | +/-      | +        | +        | +        | +     | +        | n/r    | +     | +      | -         | +      |
| 9   | Marked choroidal reflex                                                      | n/r      | -        | n/r      | n/r      | n/r   | +        | n/r    | n/r   | n/r    | n/r       | n/r    |
| 10  | Foveal hypoplasia                                                            | +        | +        | -        | +        | +     | n/r      | n/r    | +     | +      | +         | +      |
| 11  | Skin pigment dilution, mild to severe, relative to unaffected family members | +        | fair     | +        | +        | +     | +        | n/r    | +     | +      | +         | +      |
| 12  | Freckles on sun exposed areas                                                | +        | n/r      | n/r      | n/r      | n/r   | n/r      | n/r    | n/r   | n/r    | n/r       | +      |
| 13  | Hair pigment, mild to severe, dilution relative to unaffected family members | White    | Fair     | White    | White    | White | White    | Golden | Blond | Golden | White     | Golden |
| 14  | Normal number of melanocytes                                                 | n/r      | n/r      | n/r      | +        | n/r   | n/r      | n/r    | n/r   | n/r    | n/r       | n/r    |
| 15  | Reduced amount of melanin pigment in melanocytes                             | n/r      | n/r      | n/r      | +        | n/r   | n/r      | n/r    | +     | n/r    | n/r       | n/r    |

|    |                                                            |     |     |     |        |     |     |     |     |     |     |     |
|----|------------------------------------------------------------|-----|-----|-----|--------|-----|-----|-----|-----|-----|-----|-----|
| 16 | Weakly pigmented basal cell layer                          | n/r | n/r | n/r | +      | n/r |
| 17 | Accumulation of ceroid pigment in perivascular macrophages | n/r | n/r | n/r | +      | n/r | n/r | n/r | n/r | n/r | n/r | +   |
| 18 | Bleeding diathesis                                         | +   | +   | +   | +      | +   | +   | +   | +   | +   | +   | +   |
| 19 | Easy bruising                                              | +   | +   | +   | +      | +   | +   |     | +   | +   | +   | +   |
| 20 | Epistaxis                                                  | +   | +   | -   | +      | +   | +   | -   | +   | +   | +   | +   |
| 21 | Gingival bleeding                                          | +   | +   | n/r | n/r    | n/r | n/r | n/r | +   | +   | +   | +   |
| 22 | Menorrhagia                                                | n/r | +   | +   | +      | +   | +   | n/r | +   | n/r | +   | +   |
| 23 | Normal platelets count                                     | +   | n/r | n/r | -      | -/+ | -   | n/r | n/r | -   | n/r | n/r |
| 24 | Absence of platelet dense bodies                           | +   | +   | +   | +      | +   | +   | +   | +   | +   | n/r | +   |
| 25 | Lack of secondary aggregation response of platelets        | n/r | n/r | +   | +      | n/r | n/r | +   | +   | +   | n/r | +   |
| 26 | Pulmonary fibrosis                                         | +   | +   | -   | + / ++ | -   | -   | -   | -   | -   | +   | -   |
| 27 | Restrictive lung disease                                   | +   | -   | -   | +      | -   | -   | -   | -   | -   | +   | -   |
| 28 | Frequent upper respiratory tract infection                 | +   | +   | -   | +      | -   | +   | -   | -   | -   | +   | -   |
| 29 | Granulomatous colitis                                      | +   | -   | -   | +      | -   | -   | +   | +   | n/r | -   | +   |
| 30 | Abdominal pain                                             | +   | -   | -   | +      | n/r | n/r | n/r | +   | n/r | -   | +   |
| 31 | Inflammatory bowel disease                                 | +   | -   | -   | +      |     | -   | n/r | n/r | n/r | -   | n/r |
| 32 | Bloody diarrhea                                            | +   | -   | -   | +      | n/r | n/r | n/r | +   | n/r | -   | n/r |
| 33 | Neutropenia                                                | -   | +   | -   | -      | -   | -   | n/r | -   | +   | +   | -   |
| 34 | Decreased numbers of NK cells                              | -   | +   | -   | -      | -   | -   | n/r | n/r | +   | +   | -   |
| 35 | Recurrent bacterial infection                              | +   | +   | -   | -      | -   | -   | n/r | -   | +   | +   | -   |

|    |                         |              |             |              |              |              |              |                     |                    |                         |                  |               |
|----|-------------------------|--------------|-------------|--------------|--------------|--------------|--------------|---------------------|--------------------|-------------------------|------------------|---------------|
| 39 | Broad nasal root        | -            | +           | -            | -            | -            | n/r          | n/r                 | -                  | -                       | -                | -             |
| 40 | Thin upper lip          | -            | +           | -            | -            | -            | -            | n/r                 | -                  | -                       | -                | -             |
| 41 | Cardiomyopathy          | +            | -           | -            | -            | -            | -            | n/r                 | -                  | n/r                     | -                | n/r           |
| 42 | Microcephaly            | -            | +           | -            | -            | -            | -            | n/r                 | -                  | -                       | +                | -             |
| 43 | Mental retardation      | -            | +           | -            | -            | -            | -            | -                   | -                  | -                       | -                | -             |
| 44 | Reported Causative Gene | HPS1/BLOC3S1 | AP3B1/ADTB2 | HPS3/BLOC2S1 | HPS4/BLOC3S2 | HPS5/BLOC2S2 | HPS6/BLOC2S3 | HPS7/DTNBP1/BLOC1S8 | HPS8/BLOC1S3/BLOS3 | HPS9/BLOC1S1/PLDN/BLOS6 | HPS10/AP3D1/ADTD | HPS11/BLOC1S5 |
| 45 | Human locus             | 10q24.2      | 5q14.1      | 3q24         | 22q12.1      | 11p15.1      | 10q24.32     | 6p22.3              | 19q13.32           | 15q21.1                 | 19p13.3          | 6p24.3        |
| 46 | Protein Name            | HPS1         | AP3B1       | HPS3         | HPS4         | HPS5         | HPS6 Protein | Dysbindin/ HPS7     | BLOC1S3/ HPS8      | BLOC1S6/ Pallidin/HPS   | AP3D1            | BLOC5         |
| 47 | UniProtKB ID            | Q92902       | O00203      | Q969F9       | Q9NQG7       | Q9UPZ3       | Q86YV9       | Q96EV8              | Q6QNY0             | Q9UL45                  | O14617           | Q8TDH9        |

**Table S2A:** HPS3 biogenesis of lysosomal organelles complex 2 subunit 1 (NM\_0323383.5), chromosomal location 3q24, also known as BLOC2S1, SUTAL. A total 44 mutations are reported in literature that cause Hermansky Pudlak Syndrome. The 44 mutations include 16 missenses, 10 splice substitution, 10 small deletion, 3 small deletion/duplications, 2 in deletions, 2 gross deletion, and 1 gross insertion mutations.

Missense/nonsense 16 mutations

| S/No | Nucleotide | amino acid change | Reference                                                        |
|------|------------|-------------------|------------------------------------------------------------------|
| 1    | c.7C>T     | Gln3Term          | <a href="#">Lecchi (2019) Platelets , 1</a>                      |
| 2    | c.15C>G    | Tyr5Term          | <a href="#">Huizing (2020) Hum Mutat 41, 543</a>                 |
| 3    | c.319C>T   | Arg107Term        | <a href="#">Okamura (2019) Pigment Cell Melanoma Res 32, 848</a> |
| 4    | c.479G>A   | Ser160Asn         | <a href="#">Almazni (2020) Hum Mutat 41, 1848</a>                |
| 5    | c.691C>T   | Arg231Term        | <a href="#">Liu (2021) Pigment Cell Melanoma Res 34, 111</a>     |

|    |           |            |                                                                                                                                                                                      |
|----|-----------|------------|--------------------------------------------------------------------------------------------------------------------------------------------------------------------------------------|
| 6  | c.796G>A  | Glu266Lys  | <a href="#">Fromer (2014) Nature 506, 179</a>                                                                                                                                        |
| 7  | c.868C>T  | Gln290Term | <a href="#">Khan (2016) Clin Genet 90, 96</a>                                                                                                                                        |
| 8  | c.1012G>T | Glu338Term | <a href="#">Huizing (2020) Hum Mutat 41, 543</a>                                                                                                                                     |
| 9  | c.1189C>T | Arg397Trp  | <a href="#">Huizing (2001) Am J Hum Genet 69, 1022</a><br><a href="#">Capalbo (2019) PLoS Genet 15: e1008409</a><br><a href="#">Okamura (2019) Pigment Cell Melanoma Res 32: 848</a> |
| 10 | c.1509G>A | Met503Ile  | <a href="#">Yousaf (2016) Pigment Cell Melanoma Res 29, 231</a>                                                                                                                      |
| 11 | c.1673T>C | Leu558Pro  | <a href="#">Lasseaux (2018) Pigment Cell Melanoma Res.</a>                                                                                                                           |
| 12 | c.1838C>G | Ser613Term | <a href="#">Wei (2019) Pigment Cell Melanoma Res 32, 373</a><br><a href="#">Liu (2021) Pigment Cell Melanoma Res 34: 111</a>                                                         |
| 13 | c.1870G>T | Glu624Term | <a href="#">Huizing (2020) Hum Mutat 41, 543</a><br><a href="#">Turro (2020) Nature 583: 96</a>                                                                                      |
| 14 | c.2464C>T | Arg822Term | <a href="#">Bastida (2019) Ann Med epub, epub</a><br><a href="#">Bastida (2018) Haematologica 103: 148</a>                                                                           |
| 15 | c.2804G>A | Trp935Term | <a href="#">Liu (2021) Pigment Cell Melanoma Res 34, 111</a>                                                                                                                         |
| 16 | c.2805G>A | Trp935Term | <a href="#">Wei (2016) Pigment Cell Melanoma Res 29, 702</a><br><a href="#">Liu (2021) Pigment Cell Melanoma Res 34: 111</a>                                                         |

#### Splicing mutation

| S/No | Nucleotide     | Splicing mutation  | Reference                                                                                                                    |
|------|----------------|--------------------|------------------------------------------------------------------------------------------------------------------------------|
| 17   | c.712+2T>C     | IVS2 ds T-C +2     | <a href="#">Wei (2016) Pigment Cell Melanoma Res 29, 702</a><br><a href="#">Liu (2021) Pigment Cell Melanoma Res 34: 111</a> |
| 18   | c.885-1G>A     | IVS3 as G-A -1     | <a href="#">Thielen (2010) J Thromb Haemost 8, 1643</a>                                                                      |
| 19   | c.1163+1G>A    | IVS5 ds G-A +1     | <a href="#">Huizing (2001) Am J Hum Genet 69, 1022</a><br><a href="#">Xiong (2015) Science 347: 1254806</a>                  |
| 20   | c.1691+1G>A    | IVS9 ds G-A +1     | <a href="#">Huizing (2020) Hum Mutat 41, 543</a>                                                                             |
| 21   | c.1691+2T>G    | IVS9 ds T-G +2     | <a href="#">Huizing (2001) Am J Hum Genet 69, 1022</a>                                                                       |
| 22   | c.2482-2A>G    | IVS13 as A-G -2    | <a href="#">Huizing (2001) Am J Hum Genet 69, 1022</a><br><a href="#">Xiong (2015) Science 347: 1254806</a>                  |
| 23   | c.2589+1G>C    | IVS14 ds G-C +1    | <a href="#">Huizing (2001) Am J Hum Genet 69, 1022</a><br><a href="#">Xiong (2015) Science 347: 1254806</a>                  |
| 24   | c.2589+1G>T    | IVS14 ds G-T +1    | <a href="#">Huizing (2020) Hum Mutat 41, 543</a>                                                                             |
| 25   | c.2796+3A>G    | IVS15 ds A-G +3    | <a href="#">Liu (2021) Pigment Cell Melanoma Res 34, 111</a>                                                                 |
| 26   | c.2888-1612G>A | IVS16 as G-A -1612 | <a href="#">Huizing (2001) Am J Hum Genet 69, 1022</a><br><a href="#">Vorechovsky (2010) Hum Genet 127: 135</a>              |

#### Small deletions: 10 mutations

| S/No | Nucleotide | Deletion mutation | Reference |
|------|------------|-------------------|-----------|
|------|------------|-------------------|-----------|

|    |                        |                    |                                                                                                                              |
|----|------------------------|--------------------|------------------------------------------------------------------------------------------------------------------------------|
| 27 | c.437_439delGAG        | p.(Gly146del)      | <a href="#">Okamura (2019) Pigment Cell Melanoma Res 32, 848</a>                                                             |
| 28 | c.851_852delGA         | p.(Arg284Lysfs*11) | <a href="#">Huizing (2020) Hum Mutat 41, 543</a>                                                                             |
| 29 | c.1153_1160delGTCATTAC | p.(Val385Lysfs*2)  | <a href="#">Trujillano (2017) Eur J Hum Genet 25, 176</a>                                                                    |
| 30 | c.1291delC             | p.(Leu431Phefs*3)  | <a href="#">Okamura (2019) Pigment Cell Melanoma Res 32, 848</a>                                                             |
| 31 | c.1631delA             | p.(Lys544Argfs*52) | <a href="#">Liu (2021) Pigment Cell Melanoma Res 34, 111</a>                                                                 |
| 32 | c.2208_2209delTC       | p.(Gln737Alafs*20) | <a href="#">Wei (2016) Pigment Cell Melanoma Res 29, 702</a><br><a href="#">Liu (2021) Pigment Cell Melanoma Res 34: 111</a> |
| 33 | c.2628delT             | p.(Ile877Phefs*25) | <a href="#">Lasseaux (2018) Pigment Cell Melanoma Res,</a>                                                                   |
| 34 | c.2733delG             | p.(Leu912*)        | <a href="#">Huizing (2020) Hum Mutat 41, 543</a>                                                                             |
| 35 | c.2739_2742delGAGA     | p.(Glu913Aspfs*14) | <a href="#">Huizing (2020) Hum Mutat 41, 543</a>                                                                             |
| 36 | c.2771delA             | p.(Asn924Ilefs*4)  | <a href="#">Sandrock-Lang (2017) Blood Cells Mol Dis 67, 75</a>                                                              |

#### Small insertions: 3 mutations

| S/No | Nucleotide     | Protein            | Reference                                        |
|------|----------------|--------------------|--------------------------------------------------|
| 37   | c.87dupG       | p.(Arg30Alafs*2)   | <a href="#">Saito (2020) J Dermatol 47, e18</a>  |
| 38   | c.726_727ins11 | p.(Ile243Cysfs*41) | <a href="#">Huizing (2020) Hum Mutat 41, 543</a> |
| 39   | c.1426dupA     | p.(Ile476Asnfs*8)  | <a href="#">Saito (2020) J Dermatol 47, e18</a>  |

#### Small indels: 2 mutations

| S/No | Nucleotide                 | Protein              | Reference                                        |
|------|----------------------------|----------------------|--------------------------------------------------|
| 40   | c.1107_1119del13insC       | p.(Pro370_Ser373del) | <a href="#">Huizing (2020) Hum Mutat 41, 543</a> |
| 41   | c.1195_1196delAGinsGGTGCAT | p.(Ser399Glyfs*18)   | <a href="#">Huizing (2020) Hum Mutat 41, 543</a> |

#### Gross deletions: 2 mutations

| S/No | DNA level | Description         | Nucleotide        | Protein           | Reference                                                                                                                  |
|------|-----------|---------------------|-------------------|-------------------|----------------------------------------------------------------------------------------------------------------------------|
| 42   | gDNA      | 3904 bp incl. ex. 1 | Not yet available | Not yet available | <a href="#">Anikster (2001) Nat Genet 28, 376</a><br><a href="#">Torres-Serrant (2010) J Pediatr Hematol Oncol 32: 448</a> |
| 43   | cDNA      | c.89_114            | c.89_114del26     | p.(Arg30Leufs*42) | <a href="#">Liu (2021) Pigment Cell Melanoma Res 34, 111</a>                                                               |

#### Gross insertions: 1 mutation

| S/No | DNA level | Insertion/duplication | Description | Reference |
|------|-----------|-----------------------|-------------|-----------|
|------|-----------|-----------------------|-------------|-----------|

|    |      |             |                    |                                                         |
|----|------|-------------|--------------------|---------------------------------------------------------|
| 44 | gDNA | Duplication | 41 bp, c.1555_1595 | <a href="#">Power (2019) Orphanet J Rare Dis 14, 52</a> |
|----|------|-------------|--------------------|---------------------------------------------------------|

**Table S2B:** HPS4 biogenesis of lysosomal organelles complex 3 subunit 2 (NM\_022081.6), chromosomal location 22cen-q12.3, also known as BLOC3S2 and LE. A total 39 mutations are reported in literature that cause Hermansky Pudlak Syndrome. The 39 mutations consist of 23 missenses, 5 splice substitutions, 5 small deletions, 5 small insertions / duplications, and 1 gross insertion.

Missense/nonsense: 23 mutations

| S/NO | Nucleotide | HGMD amino acid change | Reference                                                                                                                                                    |
|------|------------|------------------------|--------------------------------------------------------------------------------------------------------------------------------------------------------------|
| 1    | c.45G>A    | Trp15Term              | <a href="#">Carmona-Rivera (2011) J Invest Dermatol 131, 2394</a><br><a href="#">Okamura (2018) Pigment Cell Melanoma Res 31: 267</a>                        |
| 2    | c.123T>A   | Tyr41Term              | <a href="#">Okamura (2018) Pigment Cell Melanoma Res 31, 267</a>                                                                                             |
| 3    | c.148C>T   | Gln50Term              | <a href="#">Wei (2019) Pigment Cell Melanoma Res 32, 373</a><br><a href="#">Liu (2021) Pigment Cell Melanoma Res 34: 111</a>                                 |
| 4    | c.272T>C   | Leu91Pro               | <a href="#">Bastida (2019) Ann Med epub, epub</a><br><a href="#">Bastida (2018) Haematologica 103: 148</a>                                                   |
| 5    | c.357C>G   | Tyr119Term             | <a href="#">Huizing (2020) Hum Mutat 41, 543</a>                                                                                                             |
| 6    | c.412G>T   | Glu138Term             | <a href="#">Anderson (2003) Hum Genet 113, 10</a><br><a href="#">Xiong (2015) Science 347: 1254806</a>                                                       |
| 7    | c.416G>A   | Trp139Term             | <a href="#">Power (2019) Orphanet J Rare Dis 14, 52</a>                                                                                                      |
| 8    | c.430G>T   | Glu144Term             | <a href="#">Arcot Sadagopan (2017) Ophthalmic Genet 38, 194</a>                                                                                              |
| 9    | c.461A>G   | His154Arg              | <a href="#">Anderson (2003) Hum Genet 113, 10</a>                                                                                                            |
| 10   | c.541C>T   | Gln181Term             | <a href="#">Suzuki (2002) Nat Genet 30, 321</a><br><a href="#">Saito (2013) Psychiatr Genet 23: 163</a><br><a href="#">Xiong (2015) Science 347: 1254806</a> |
| 11   | c.554G>A   | Arg185His              | <a href="#">Arcot Sadagopan (2017) Ophthalmic Genet 38, 194</a>                                                                                              |
| 12   | c.649C>T   | Arg217Term             | <a href="#">Anderson (2003) Hum Genet 113, 10</a><br><a href="#">Xiong (2015) Science 347: 1254806</a><br><a href="#">Lozynska (2018) Exp Oncol 40: 73</a>   |
| 13   | c.664G>T   | Glu222Term             | <a href="#">Anderson (2003) Hum Genet 113, 10</a><br><a href="#">Xiong (2015) Science 347: 1254806</a>                                                       |
| 14   | c.667C>T   | Gln223Term             | <a href="#">Hou (2020) Proc Natl Acad Sci U S A 117, 3053</a>                                                                                                |
| 15   | c.730C>T   | Gln244Term             | <a href="#">Araki (2014) J Dermatol 41, 186</a>                                                                                                              |
| 16   | c.803G>A   | Arg268Lys              | <a href="#">Lasseaux (2018) Pigment Cell Melanoma Res.</a>                                                                                                   |
| 17   | c.1132C>T  | Gln378Term             | <a href="#">Huizing (2020) Hum Mutat 41, 543</a>                                                                                                             |
| 18   | c.1318C>T  | Gln440Term             | <a href="#">Sandrock-Lang (2018) Blood Cells Mol Dis 69, 113</a>                                                                                             |
| 19   | c.1396C>T  | Arg466Cys              | <a href="#">Stearman (2019) Am J Respir Crit Care Med epub, epub</a>                                                                                         |

|    |           |            |                                                                                                      |
|----|-----------|------------|------------------------------------------------------------------------------------------------------|
| 20 | c.1546C>T | Gln516Term | <a href="#">Huizing (2020) Hum Mutat 41, 543</a>                                                     |
| 21 | c.1856C>T | Pro619Leu  | <a href="#">Lasseaux (2018) Pigment Cell Melanoma Res.</a>                                           |
| 22 | c.1858C>T | Gln620Term | <a href="#">Sakata (2013) Respir Med Case Rep 9, 38</a>                                              |
| 23 | c.1891C>T | Gln631Term | <a href="#">Suzuki (2002) Nat Genet 30, 321</a><br><a href="#">Xiong (2015) Science 347: 1254806</a> |

#### Splicing: 5 mutations

| S/NO | Nucleotide  | Splicing mutation | Reference                                                                                                                    |
|------|-------------|-------------------|------------------------------------------------------------------------------------------------------------------------------|
| 24   | c.276+5G>A  | IVS4 ds G-A +5    | <a href="#">Yousaf (2016) Pigment Cell Melanoma Res 29, 231</a>                                                              |
| O25  | c.597-2A>T  | IVS7 as A-T -2    | <a href="#">Jones (2012) J Thromb Haemost 10, 306</a>                                                                        |
| 26   | c.596+1G>A  | IVS7 ds G-A +1    | <a href="#">Okamura (2019) Pigment Cell Melanoma Res 32, 848</a>                                                             |
| 27   | c.706+1G>A  | IVS9 ds G-A +1    | <a href="#">Huizing (2020) Hum Mutat 41, 543</a>                                                                             |
| 28   | c.1713+5G>C | IVS11 ds G-C +5   | <a href="#">Wei (2019) Pigment Cell Melanoma Res 32, 373</a><br><a href="#">Liu (2021) Pigment Cell Melanoma Res 34: 111</a> |

#### Small deletions: 5 mutations

| S/NO | Nucleotide       | Protein            | Reference                                                                                                                                                       |
|------|------------------|--------------------|-----------------------------------------------------------------------------------------------------------------------------------------------------------------|
| 29   | c.47delA         | p.(Asn16Ilefs*11)  | <a href="#">Carmona-Rivera (2011) J Invest Dermatol 131, 2394</a>                                                                                               |
| 30   | c.57delT         | p.(Leu20Phefs*7)   | <a href="#">Suzuki (2002) Nat Genet 30, 321</a>                                                                                                                 |
| 31   | c.61delT         | p.(Tyr21Metfs*6)   | <a href="#">Hou (2020) Proc Natl Acad Sci U S A 117, 3053</a>                                                                                                   |
| 32   | c.1547_1548delAG | p.(Gln516Argfs*42) | <a href="#">Arcot Sadagopan (2017) Ophthalmic Genet 38, 194</a>                                                                                                 |
| 33   | c.2054delC       | p.(Pro685Leufs*17) | <a href="#">Bachli (2004) Am J Med Genet A 127A, 201</a><br><a href="#">Bastida (2018) Haematologica 103: 148</a><br><a href="#">Bastida (2019) Ann Med : 1</a> |

#### Small insertions: 5 mutations

| S/NO | Nucleotide          | Protein            | Reference                                                            |
|------|---------------------|--------------------|----------------------------------------------------------------------|
| 34   | c.630dupC           | p.(Ala211Argfs*47) | <a href="#">Wu (2019) Medicine (Baltimore) 98, e16899</a>            |
| 35   | c.1102dupG          | p.(Asp368Glyfs*4)  | <a href="#">Deng (2018) Hum Mutat 39, 1238</a>                       |
| 36   | c.1896_1897dupCG    | p.(Val633Alafs*4)  | <a href="#">Okamura (2019) Pigment Cell Melanoma Res 32, 848</a>     |
| 37   | c.1966_1967dupAC    | p.(Ala657Argfs*46) | <a href="#">Stearman (2019) Am J Respir Crit Care Med epub, epub</a> |
| 38   | c.2089_2093dupAAGCA | p.(Lys699Serfs*5)  | <a href="#">Suzuki (2002) Nat Genet 30, 321</a>                      |

#### Gross insertions: 1 mutation

| S/N0 | DNA<br>level | Insertion/<br>duplication | Description       | Reference                              |
|------|--------------|---------------------------|-------------------|----------------------------------------|
| 39   | cDNA         | Duplication               | 24 bp nt. 949-972 | <u>Suzuki (2002) Nat Genet 30, 321</u> |
